# Supplementary figures and images for: Gene expression signatures of morphologically normal breast tissue identify basal-like tumors
Source: Springer Nature journal article supplement (doi:10.1186/bcr1608), 2006-10-20

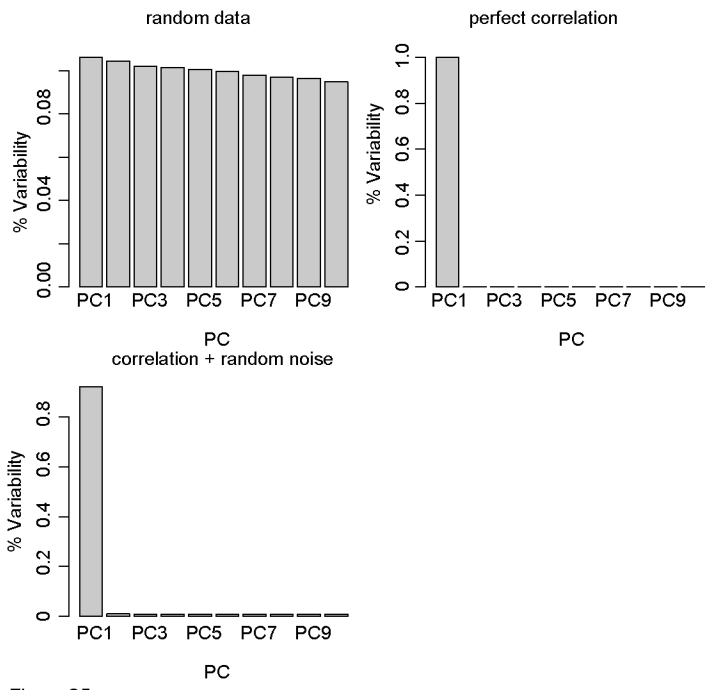

Figure S5

Supplement: Additional file 13 [file bcr1608-s13.pdf]
